# Supplementary material for: The effect of the layer-interlayer chemistry of LDHs on developing high temperature carbon capture materials
Source: Royal Society of Chemistry journal article supplement (doi:10.1039/c9dt03913a), 2019-12-03
Supplement: c9dt03913a9.pdf [file c9dt03913a9.pdf]

## **Electronic supporting information**

### **The effect of layer-interlayer Chemistry of LDHs on developing high temperature carbon capture materials**

G. V. Manohara\*, M. Mercedes Maroto-Valer, Susana Garcia\*

Research Centre for Carbon Solutions (RCCS), School of Engineering and Physical Sciences,

Heriot-Watt University, Edinburgh EH14 4AS, United Kingdom.

\*Corresponding authors;

Email: [s.garcia@hw.ac.uk](mailto:s.garcia@hw.ac.uk), [manoharagv@gmail.com](mailto:manoharagv@gmail.com)

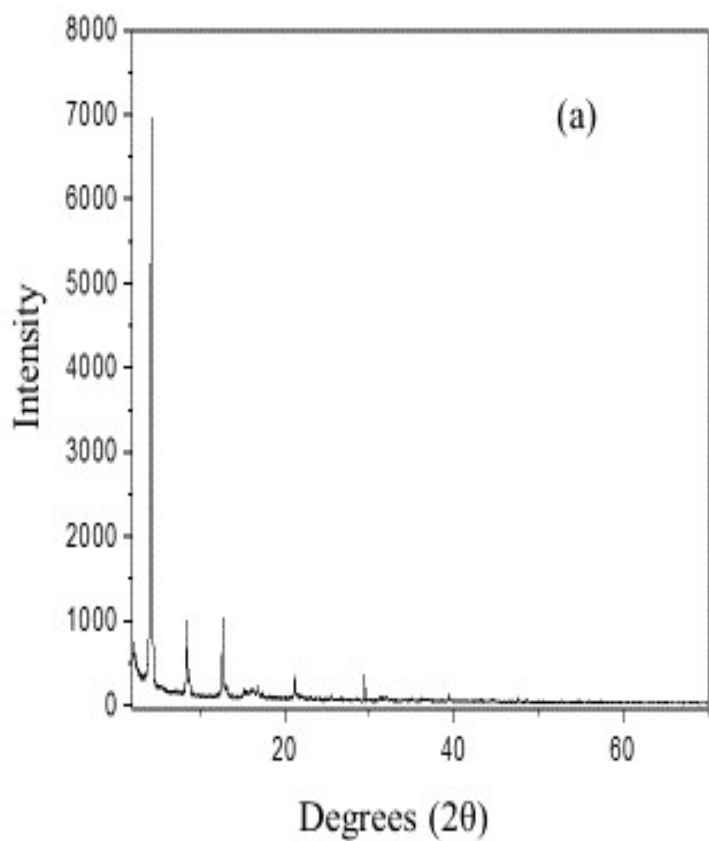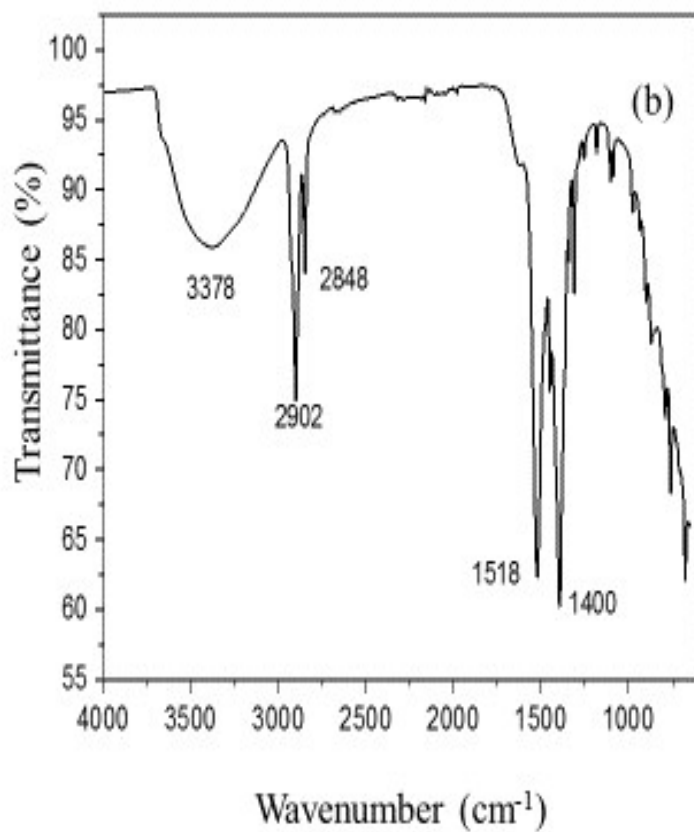

**SI 1. (a) PXRD pattern and (b) FTIR spectrum of Ca/Al-adamantanecarboxylate LDH synthesized by co-hydration route.**

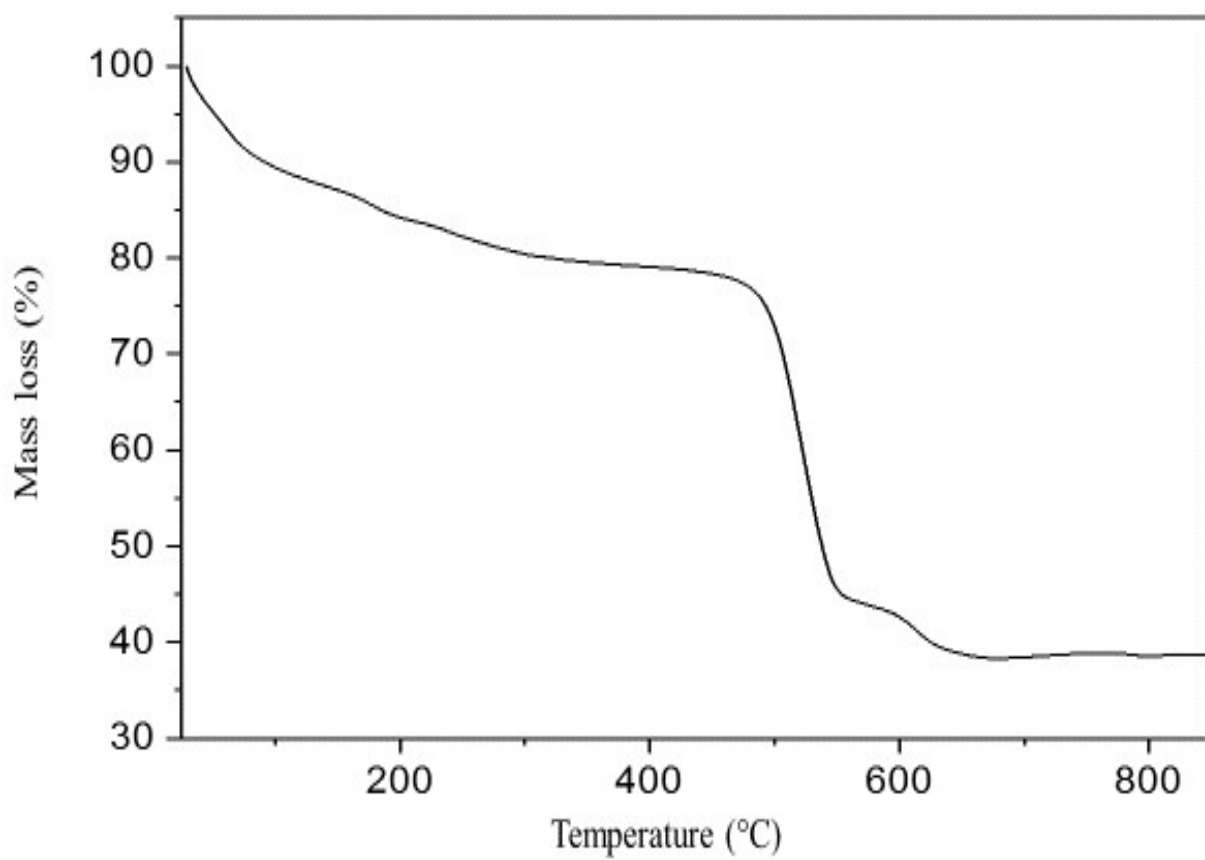

**SI 2. TGA profile of Ca/Al-adamantanecarboxylate LDH synthesized by co-hydration route under N<sub>2</sub> atmosphere.**

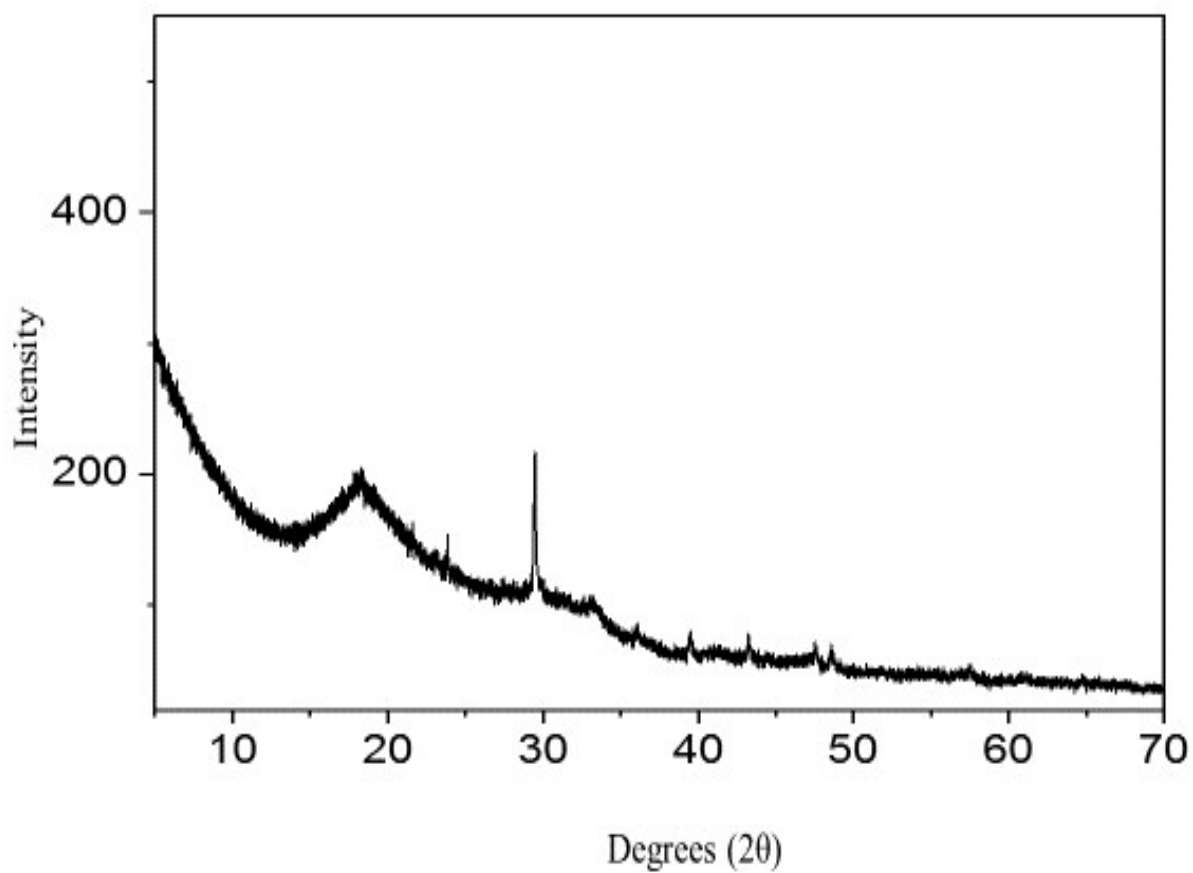

**SI 3. PXRD pattern of Organic-Inorganic hybrid MMOs obtained from decomposition of Ca/Al-adamantanecarboxylate LDH.**

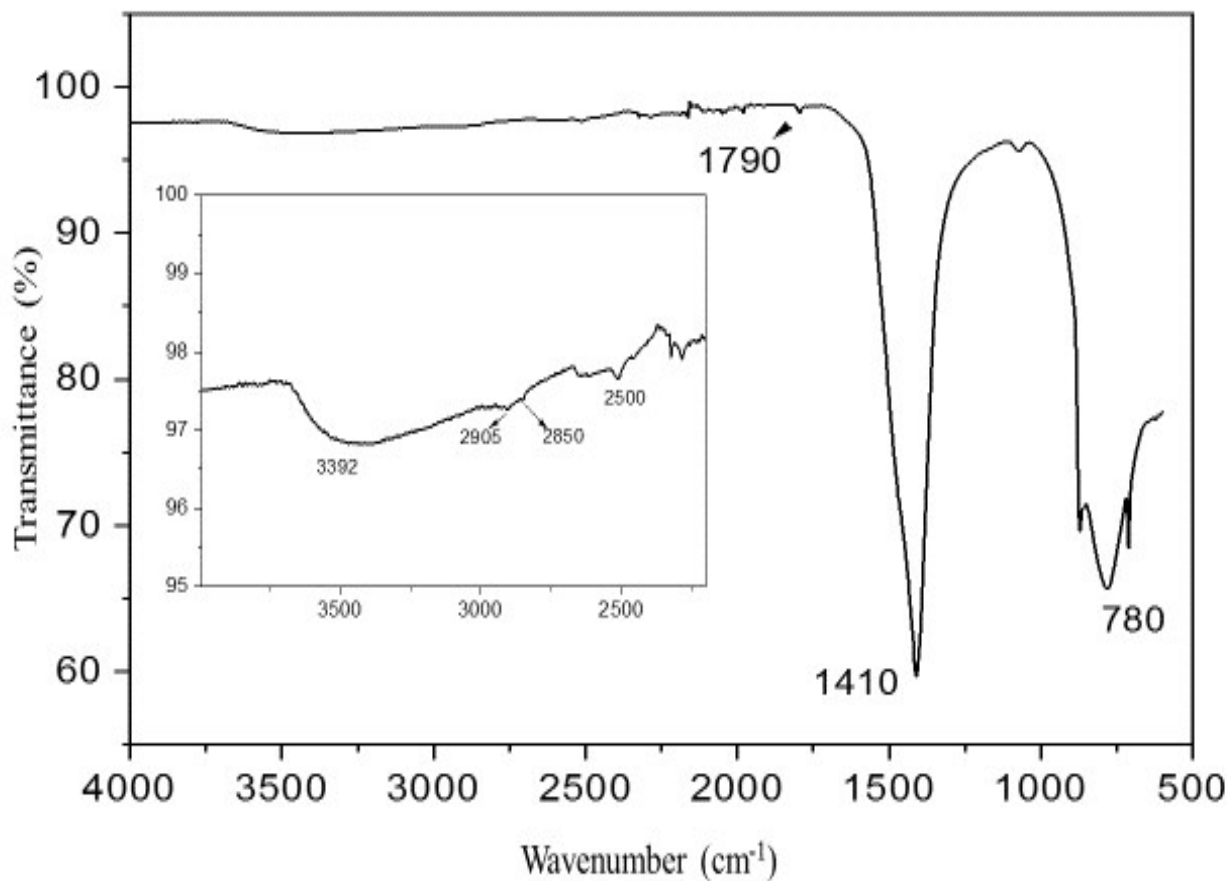

**SI 4. FTIR spectrum of Organic-Inorganic hybrid MMOs obtained from decomposition of Ca/Al-adamantanecarboxylate LDH. Inset shows the extended spectra between 4000 and 2000 cm<sup>-1</sup>.**

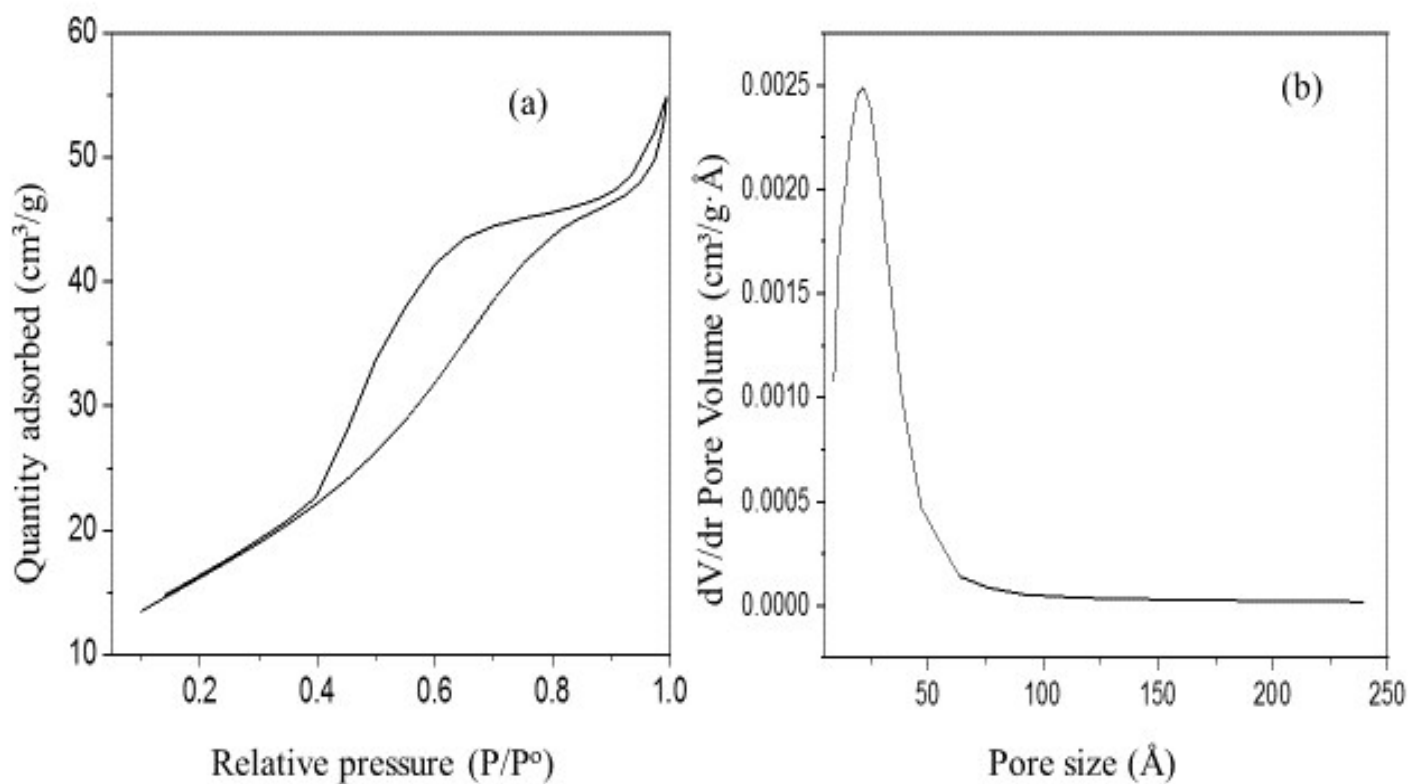

**SI 5. (a) Adsorption isotherm (N<sub>2</sub>, 77 K) and (b) Pore size distribution of Organic-Inorganic hybrid MMOs obtained from decomposition of Ca/Al-adamantanecarboxylate LDH.**

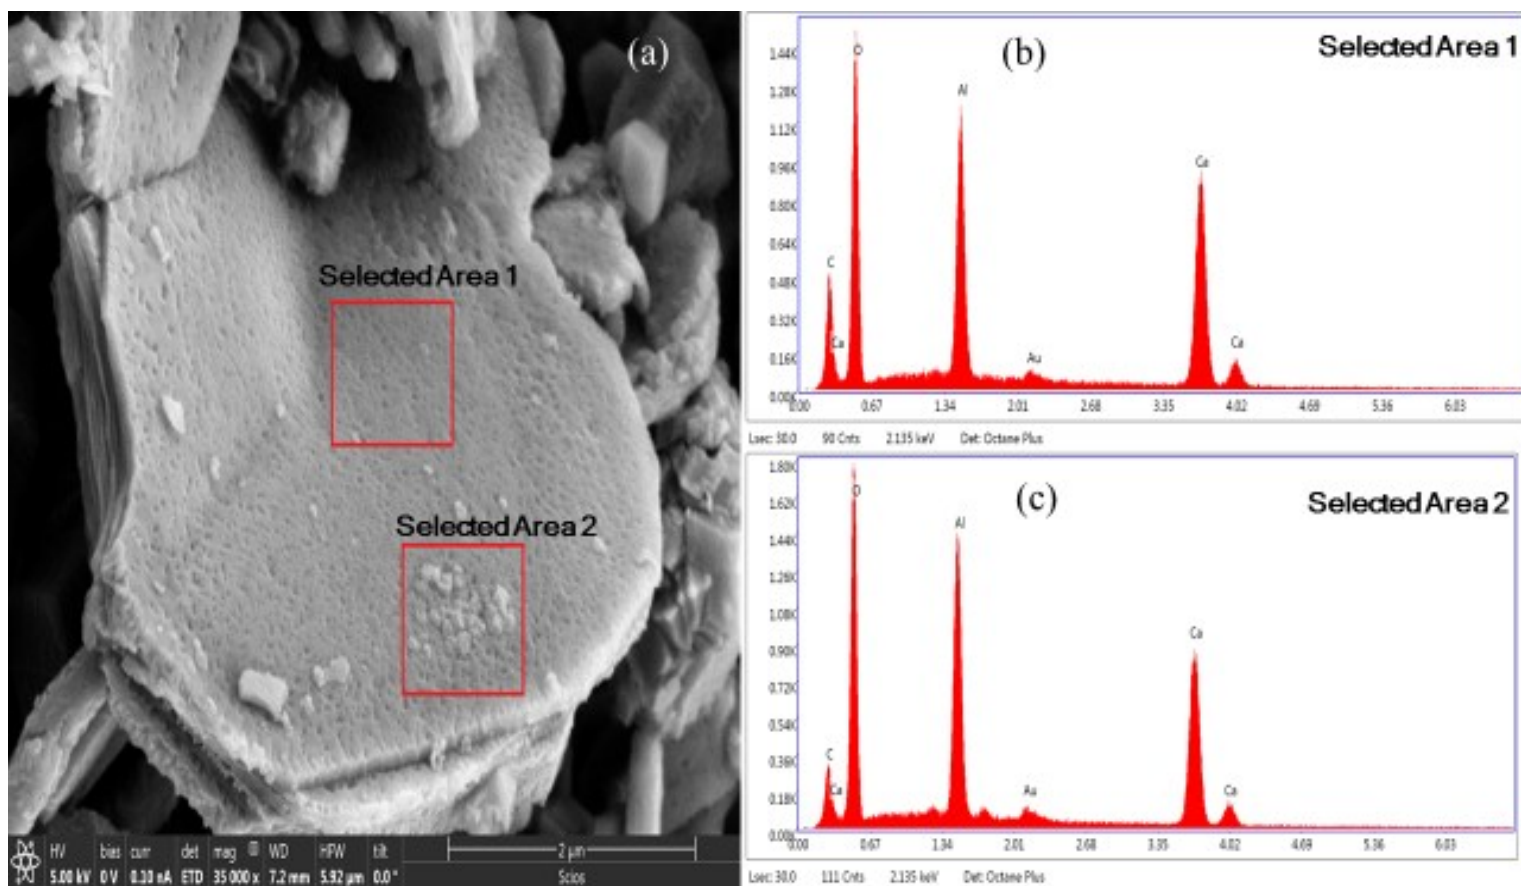

**SI 6. Organic-Inorganic hybrid MMOs obtained from decomposition of Ca/Al-adamantanecarboxylate LDH. (a) SEM image used for EDX analysis (b) EDX spectrum corresponds to selected area 1 in (a) and (c) EDX spectrum corresponds to selected area 2 in (a).**

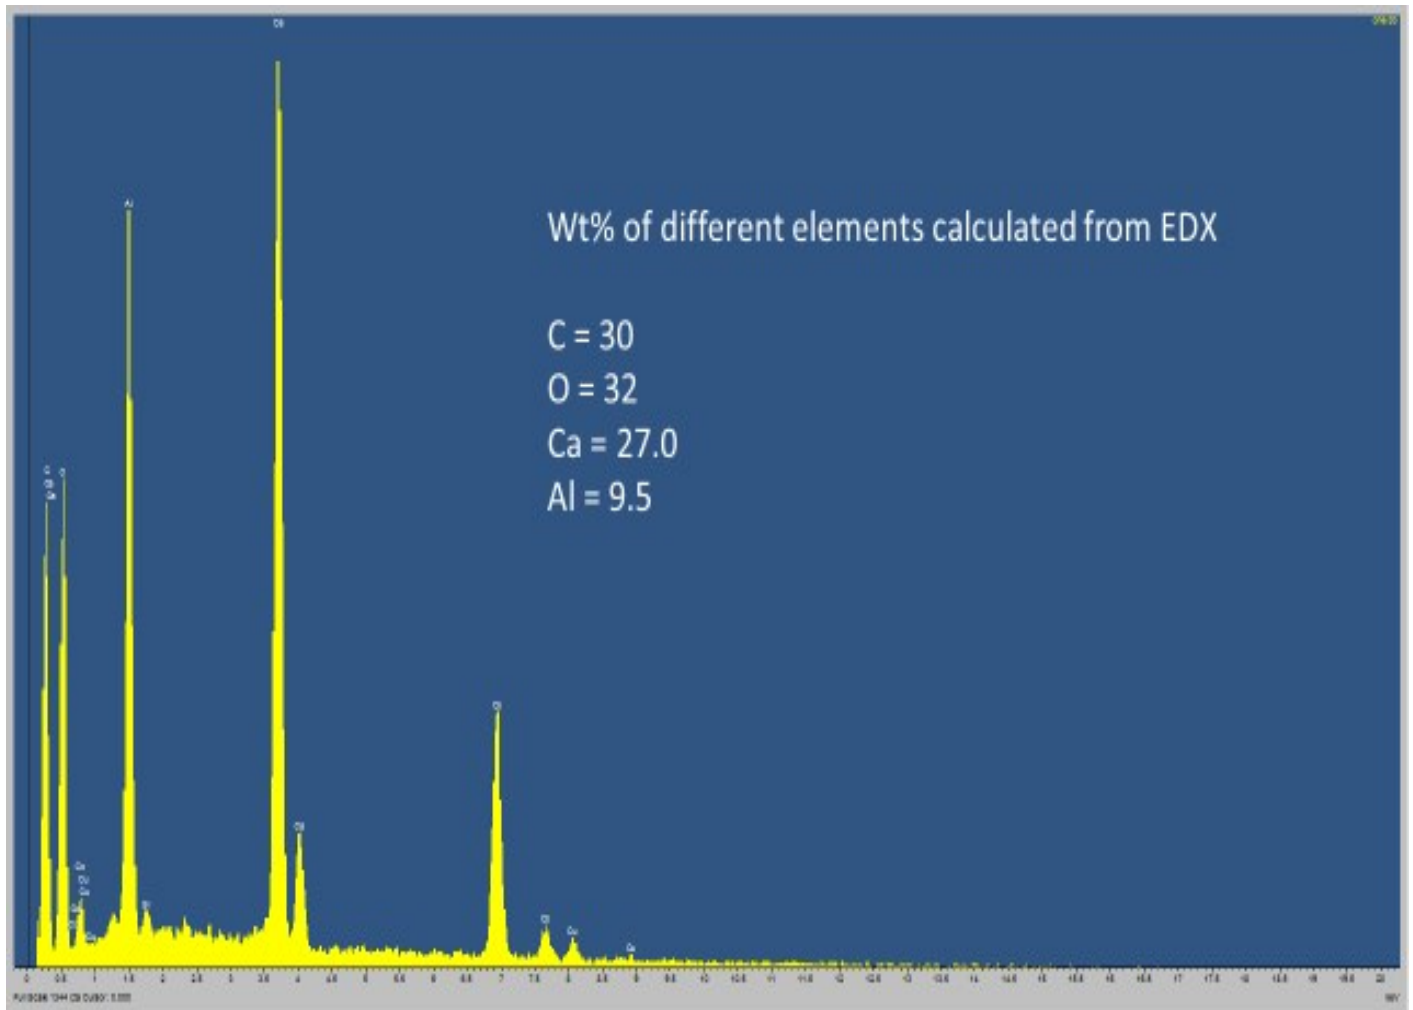

**SI 7. EDX spectrum of Organic-Inorganic hybrid MMOs obtained from decomposition of Ca/Al-adamantanecarboxylate LDH.**



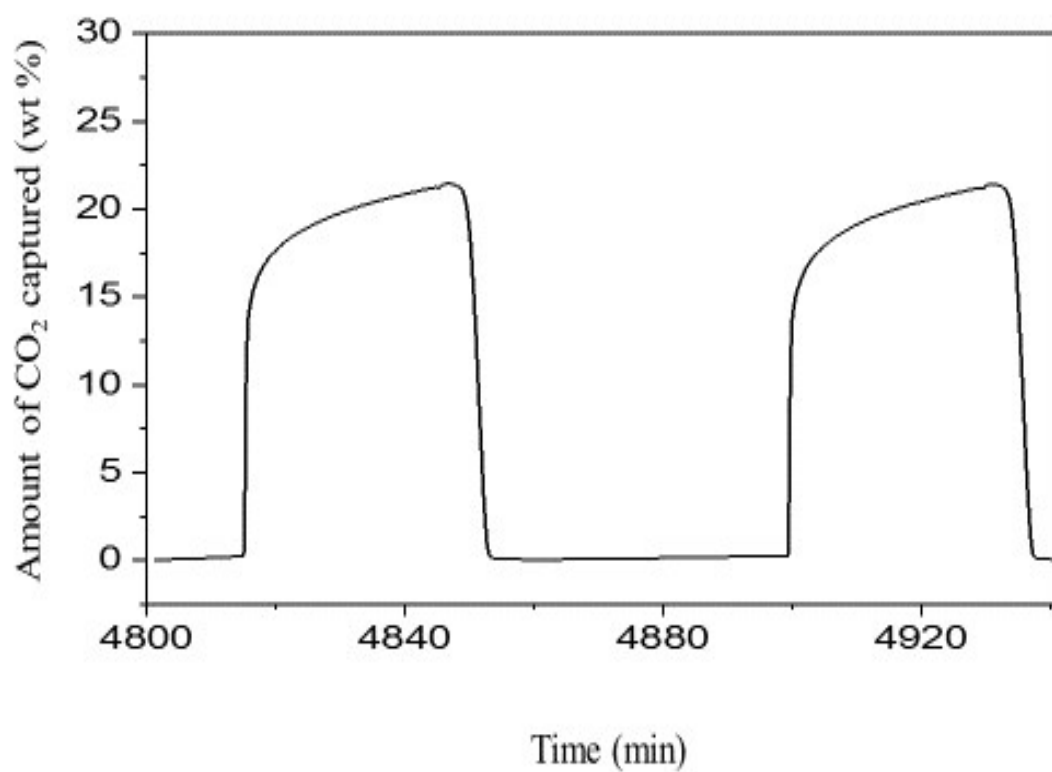

**SI 8. Kinetic data of carbonation/regeneration cycle (cycle number 55-56) of Organic-Inorganic hybrid MMOs obtained from decomposition of Ca/Al-adamantanecarboxylate LDH.**
