# Supplementary figures and images for: The effect of the layer-interlayer chemistry of LDHs on developing high temperature carbon capture materials
Source: Royal Society of Chemistry journal article supplement (doi:10.1039/c9dt03913a), 2019-12-03

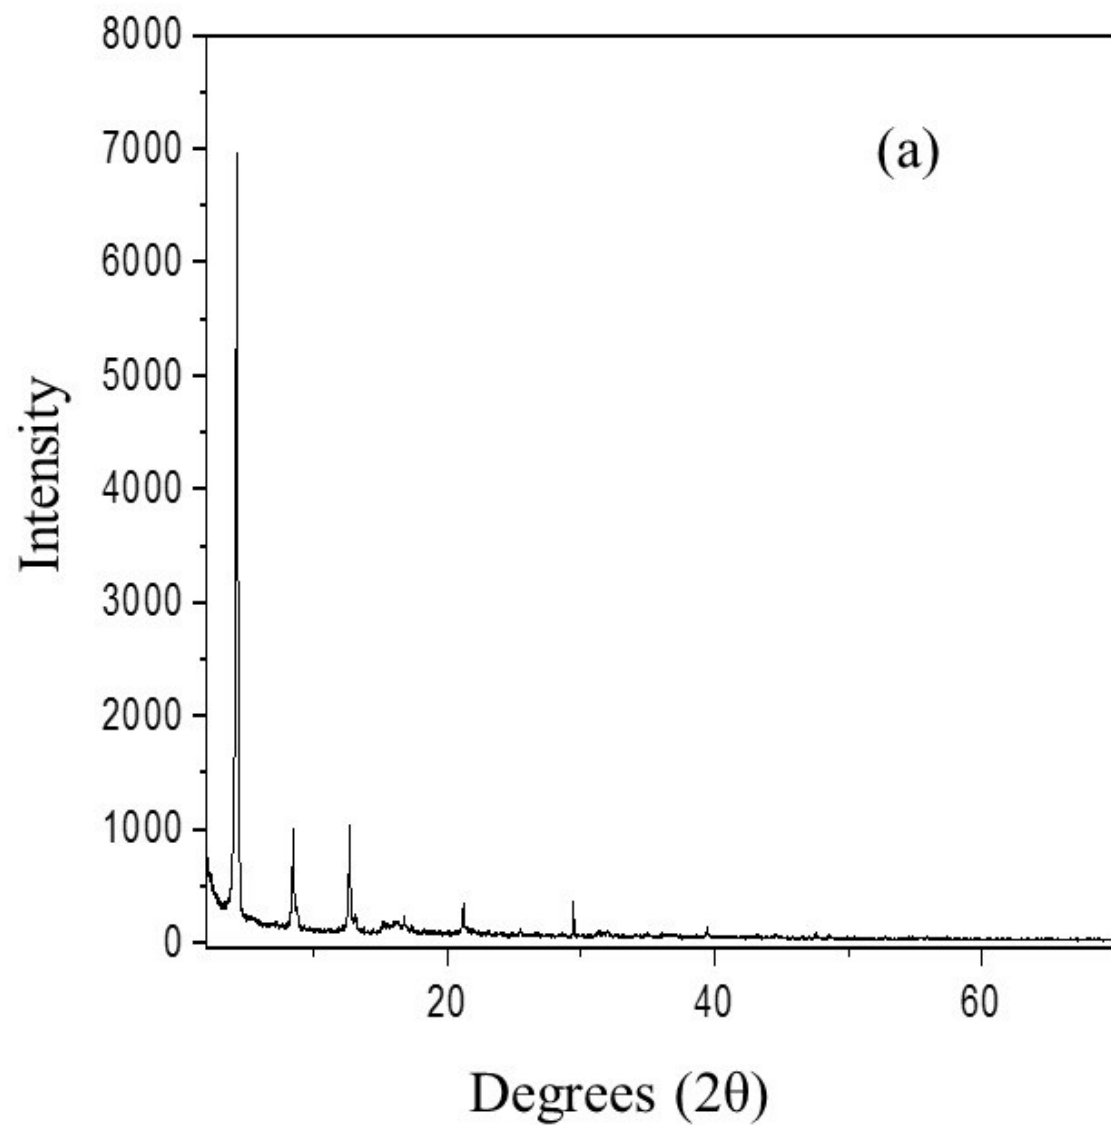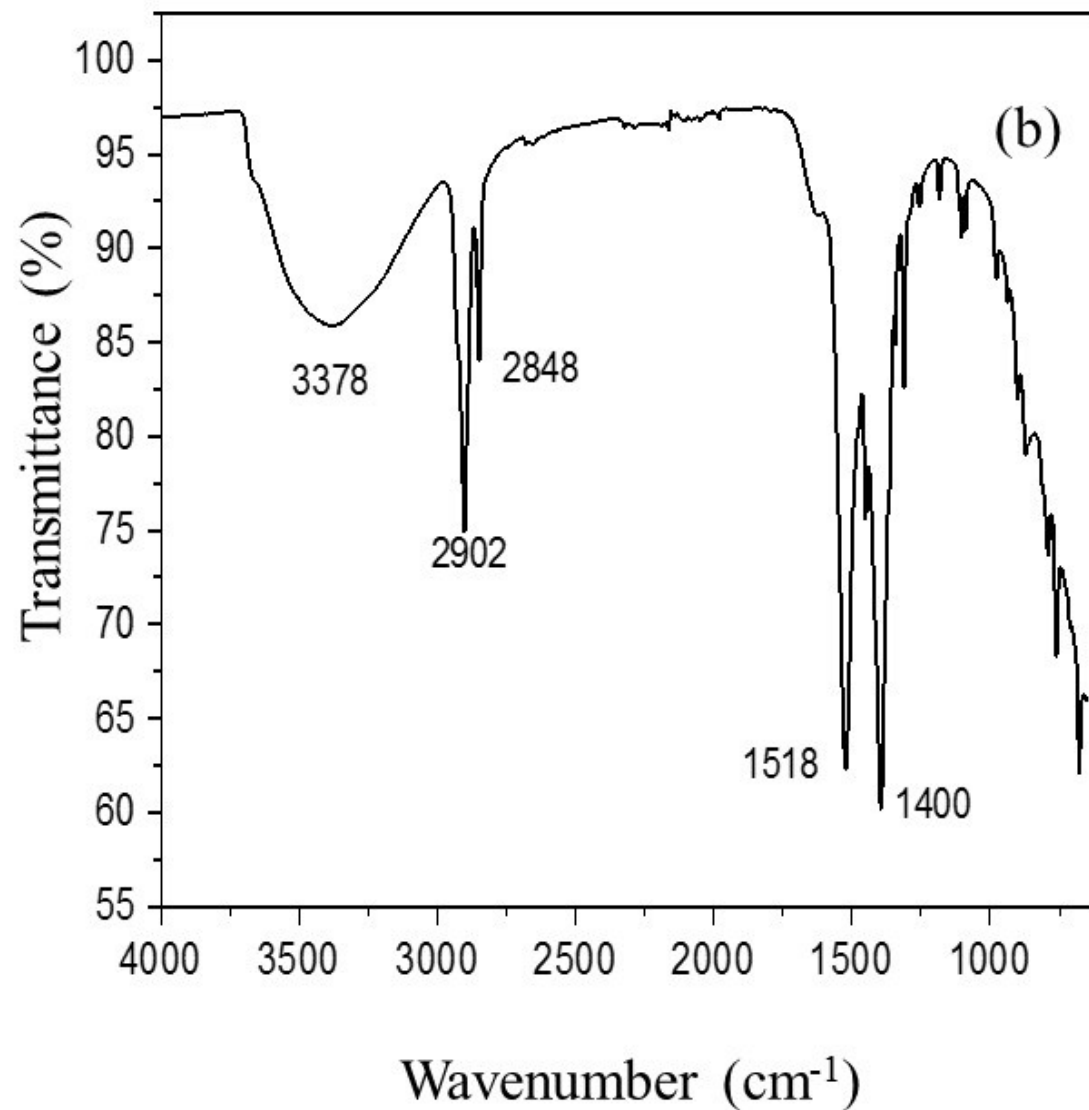

Supplement: c9dt03913a1.pdf [file c9dt03913a1.pdf]

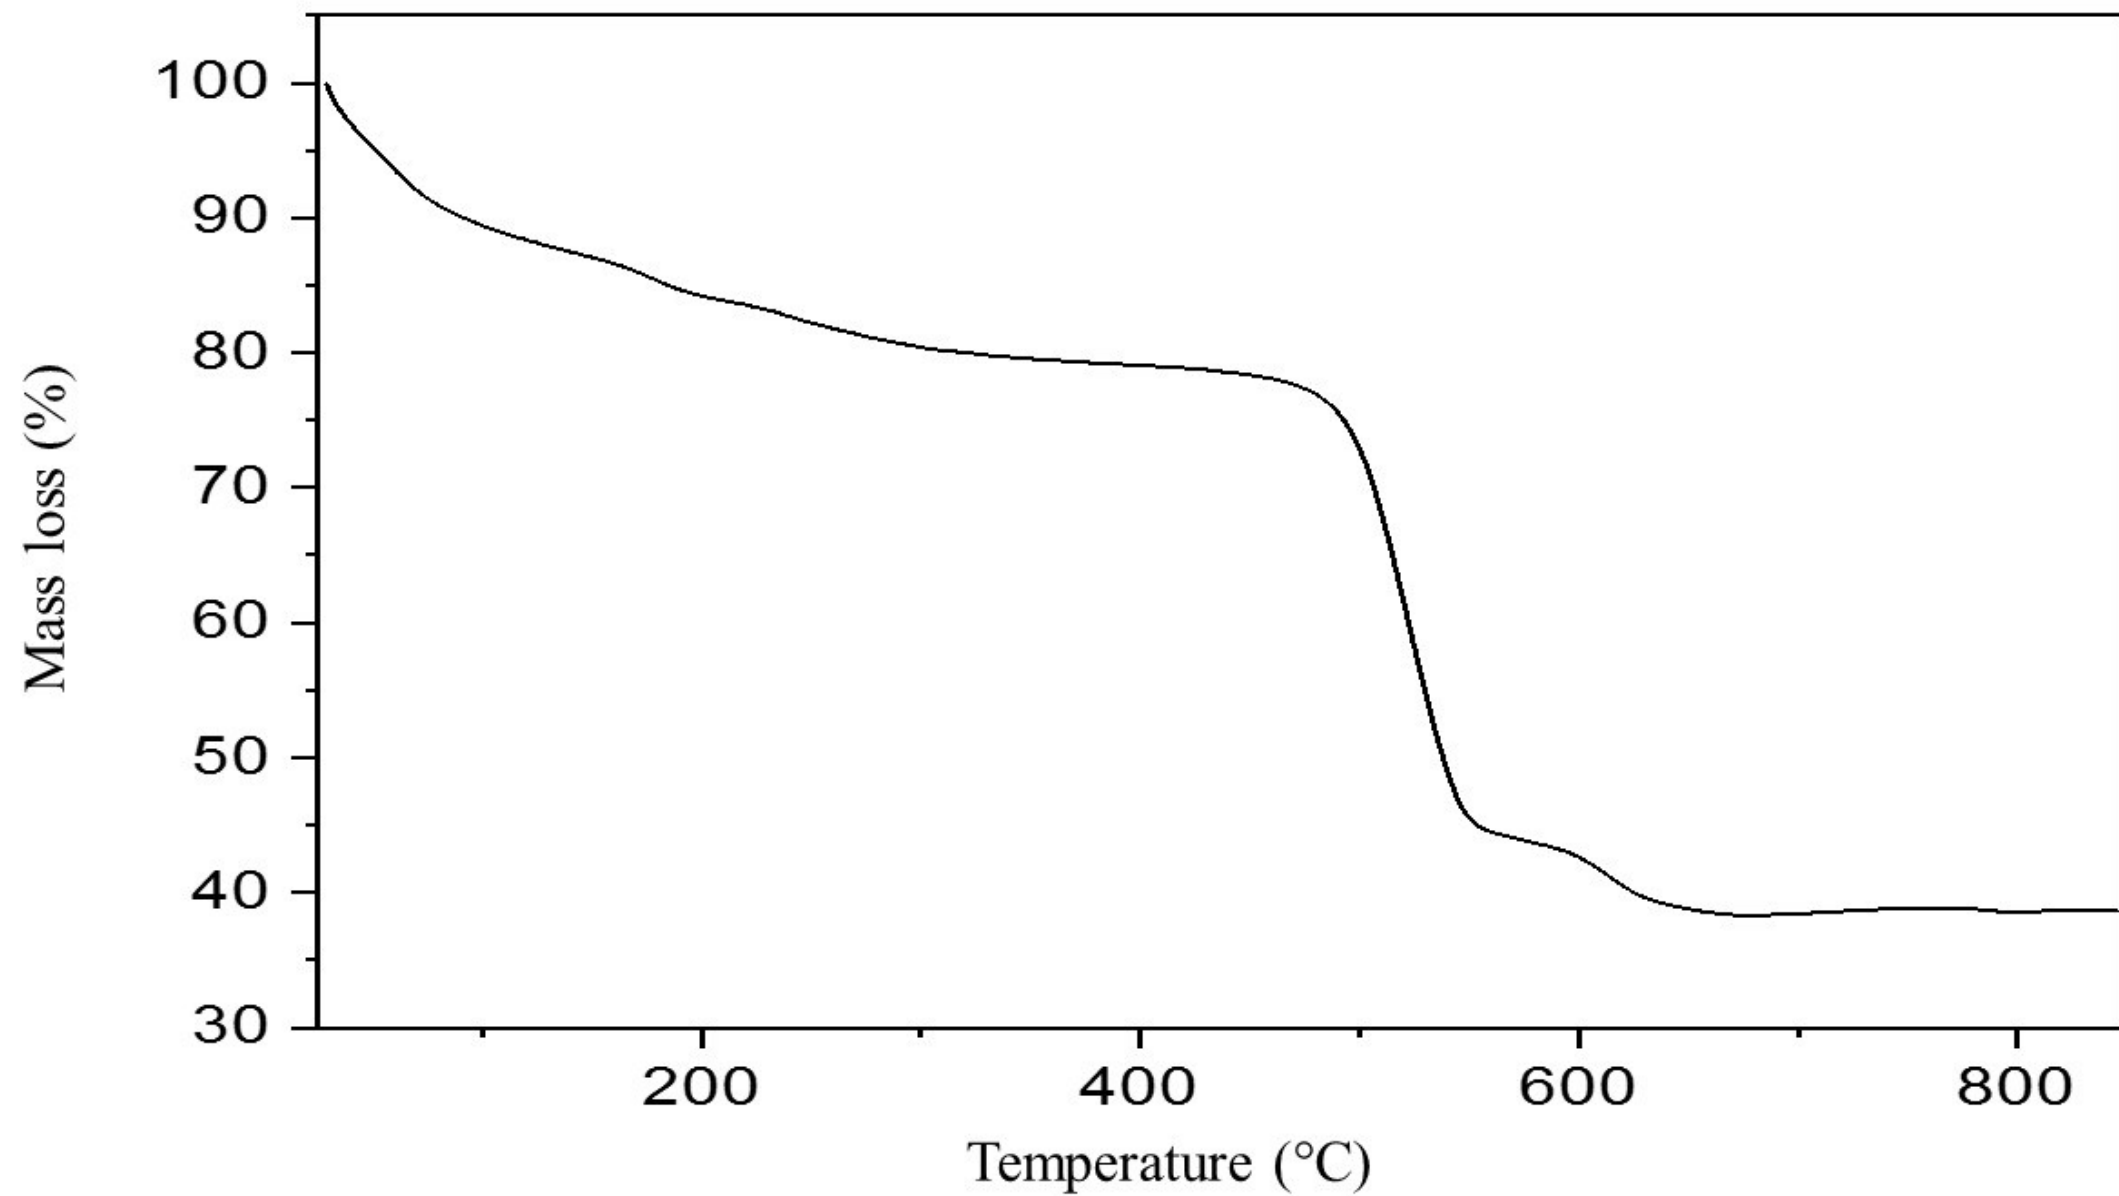

Supplement: c9dt03913a2.pdf [file c9dt03913a2.pdf]

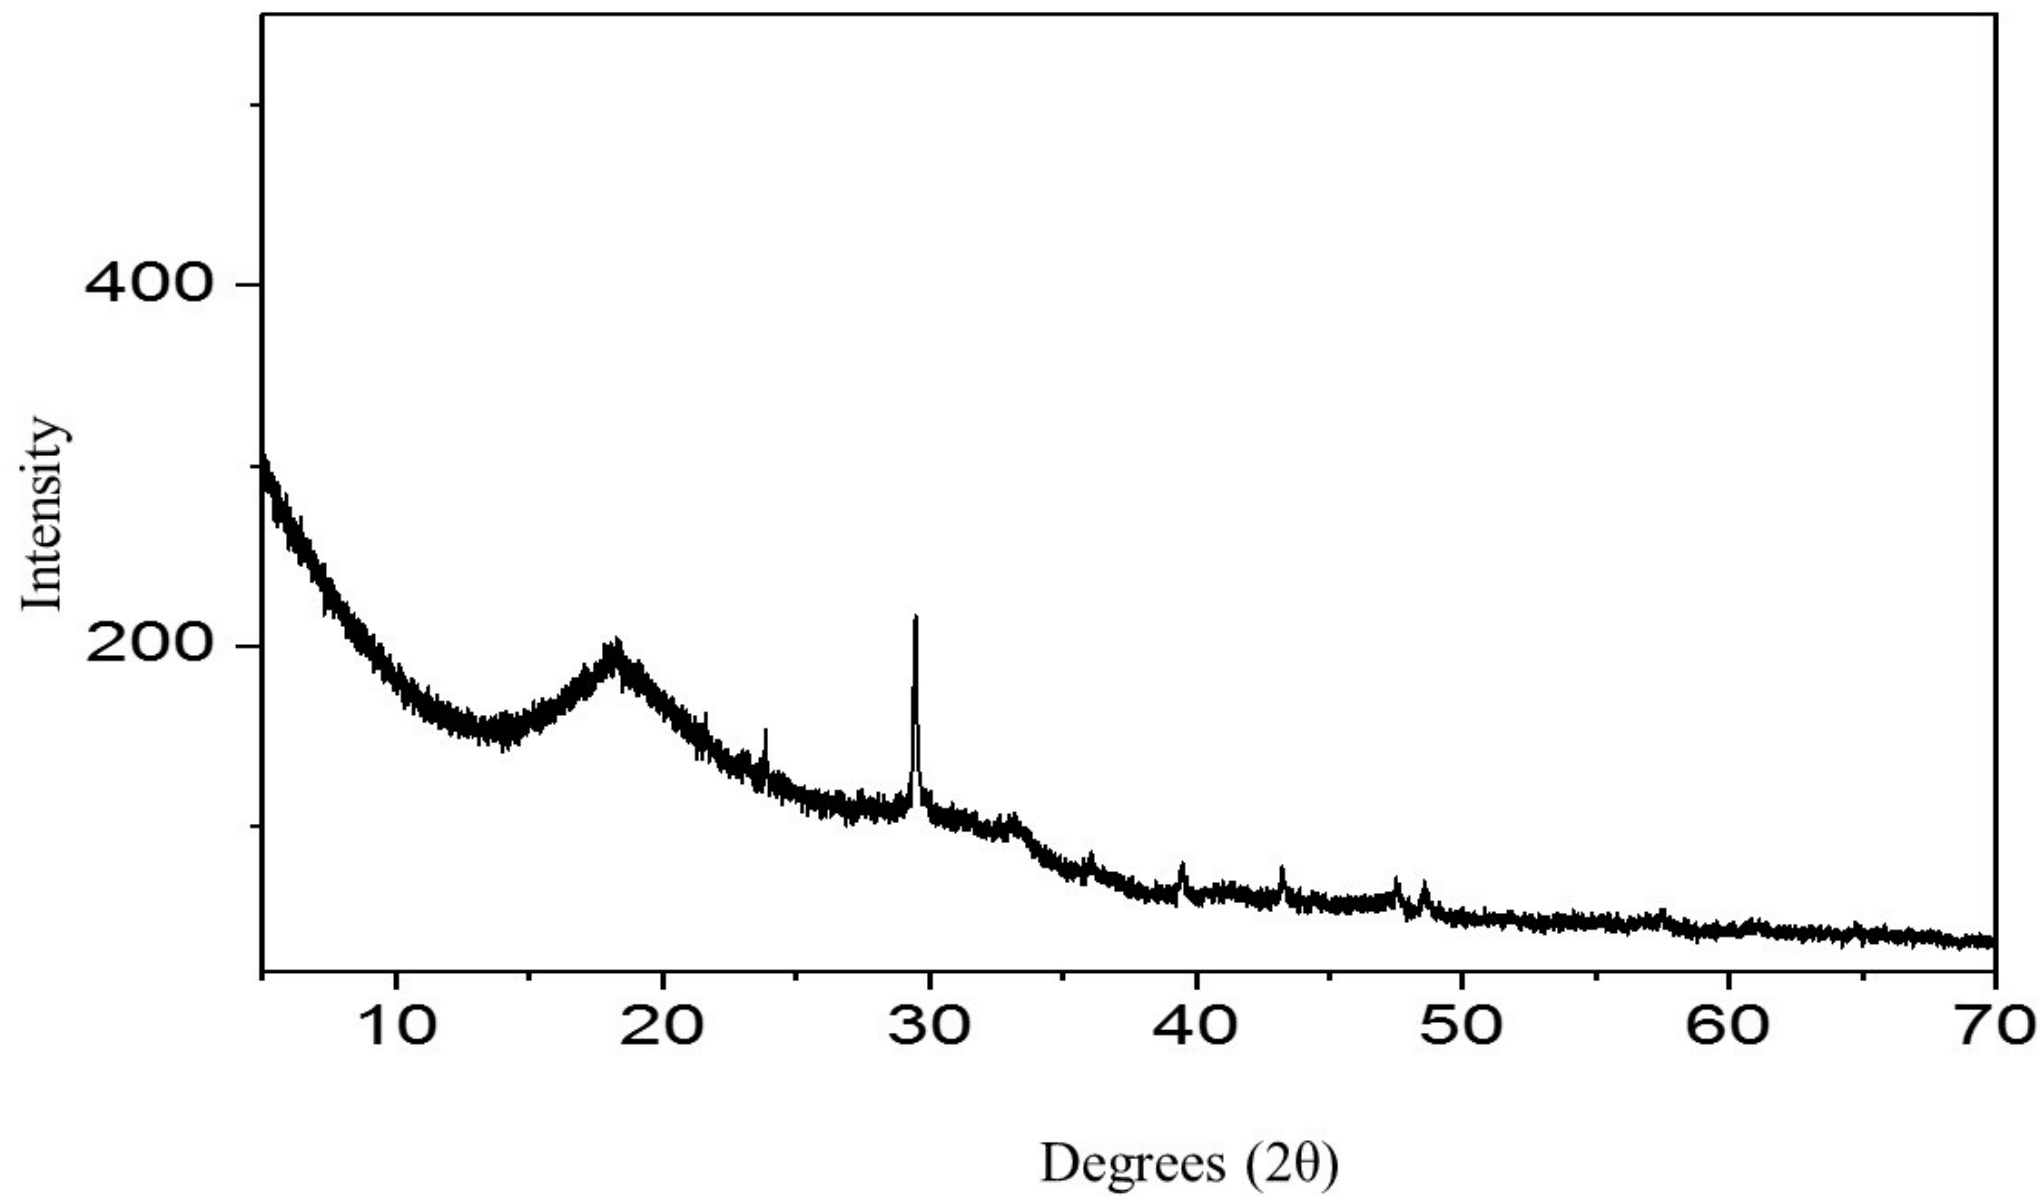

Supplement: c9dt03913a3.pdf [file c9dt03913a3.pdf]

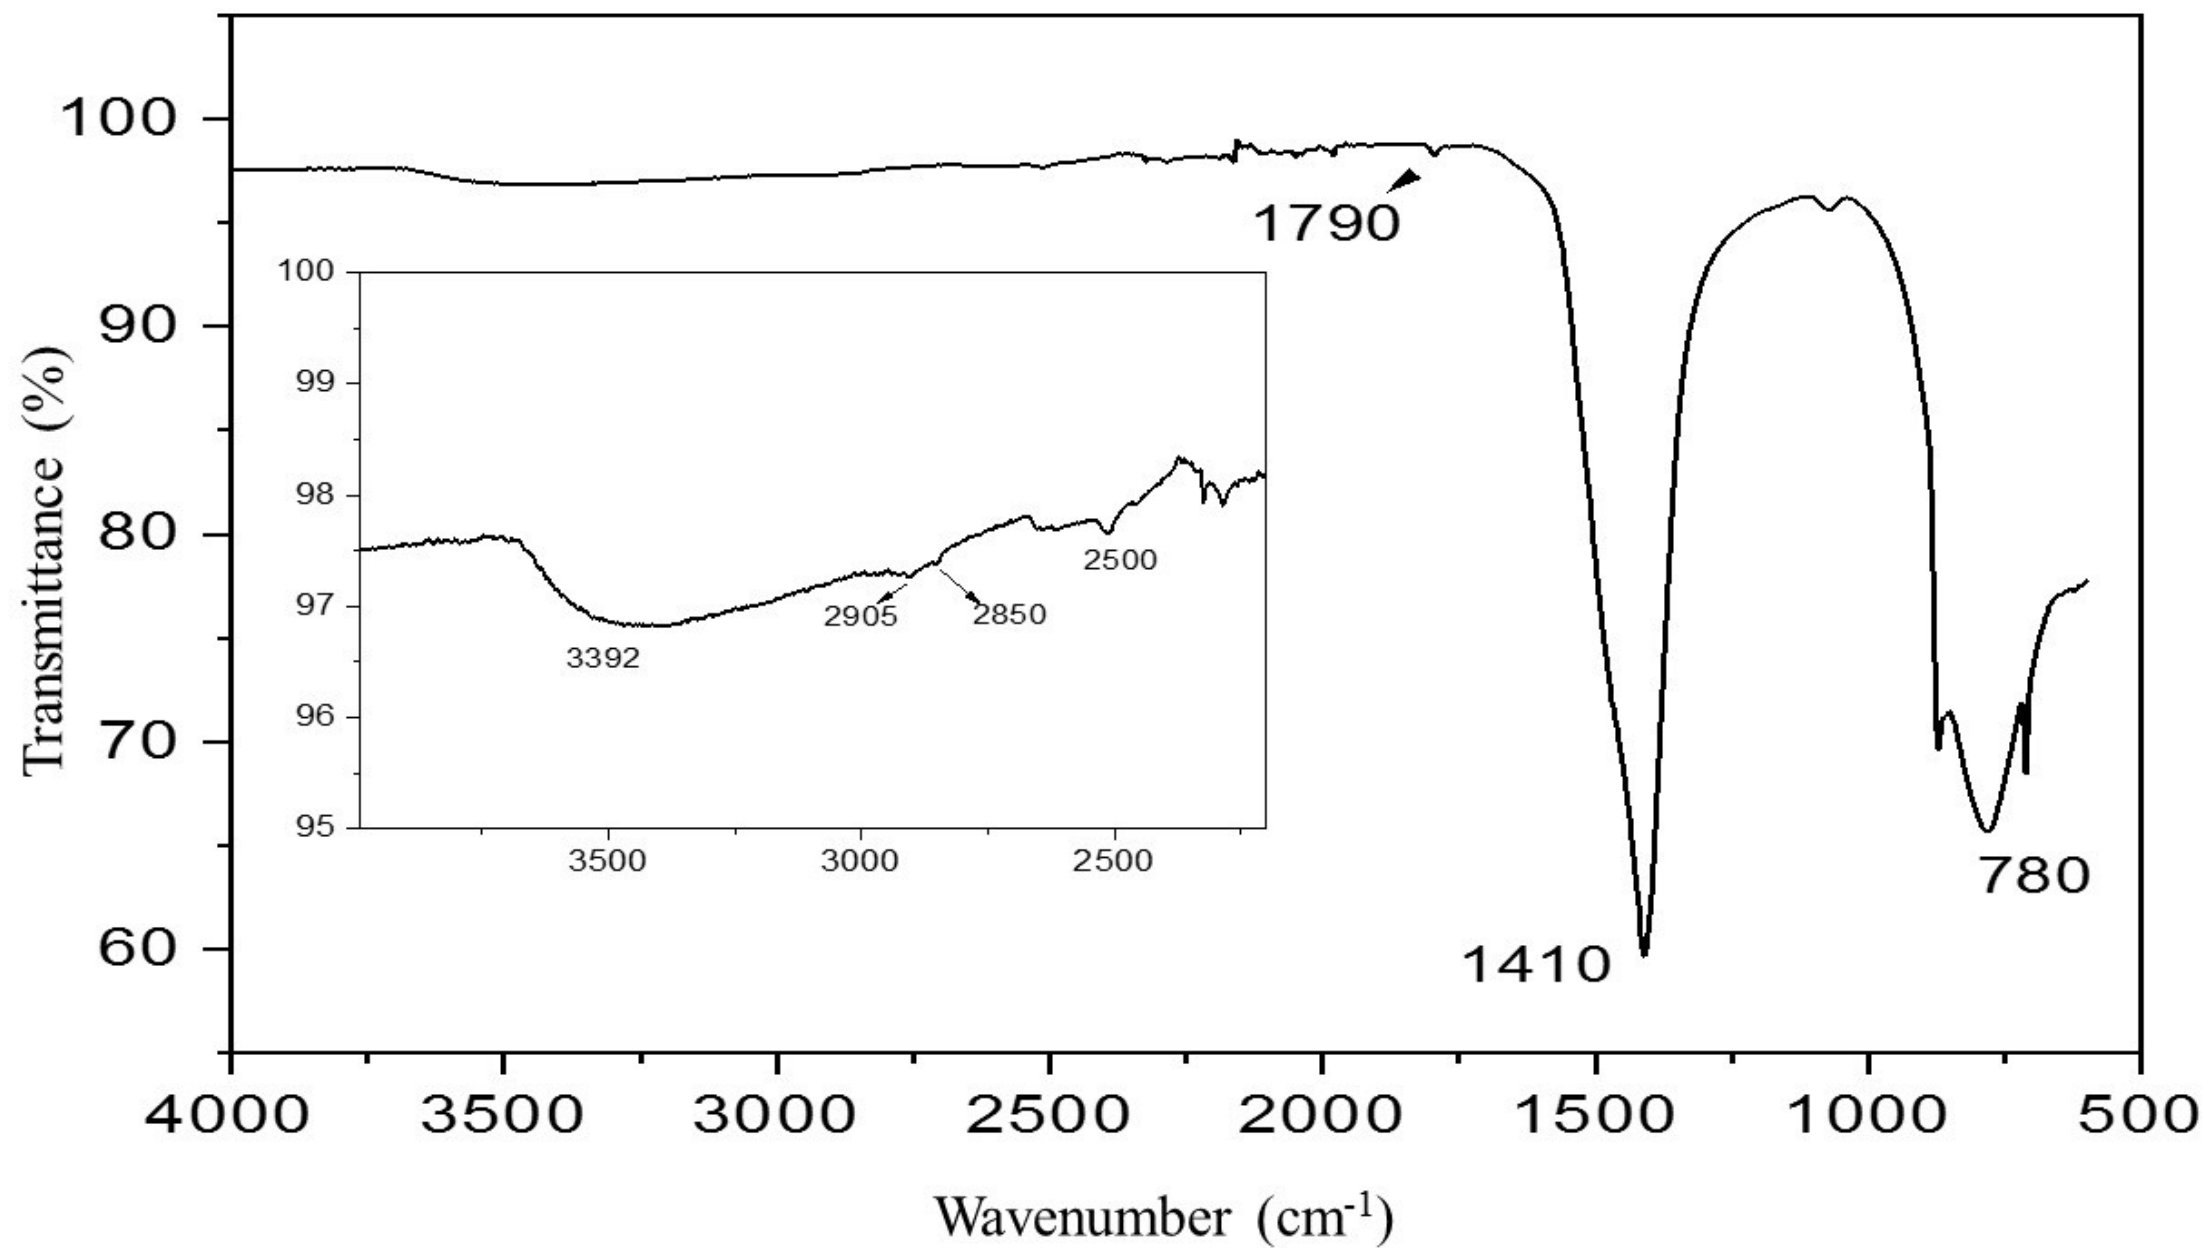

Supplement: c9dt03913a4.pdf [file c9dt03913a4.pdf]

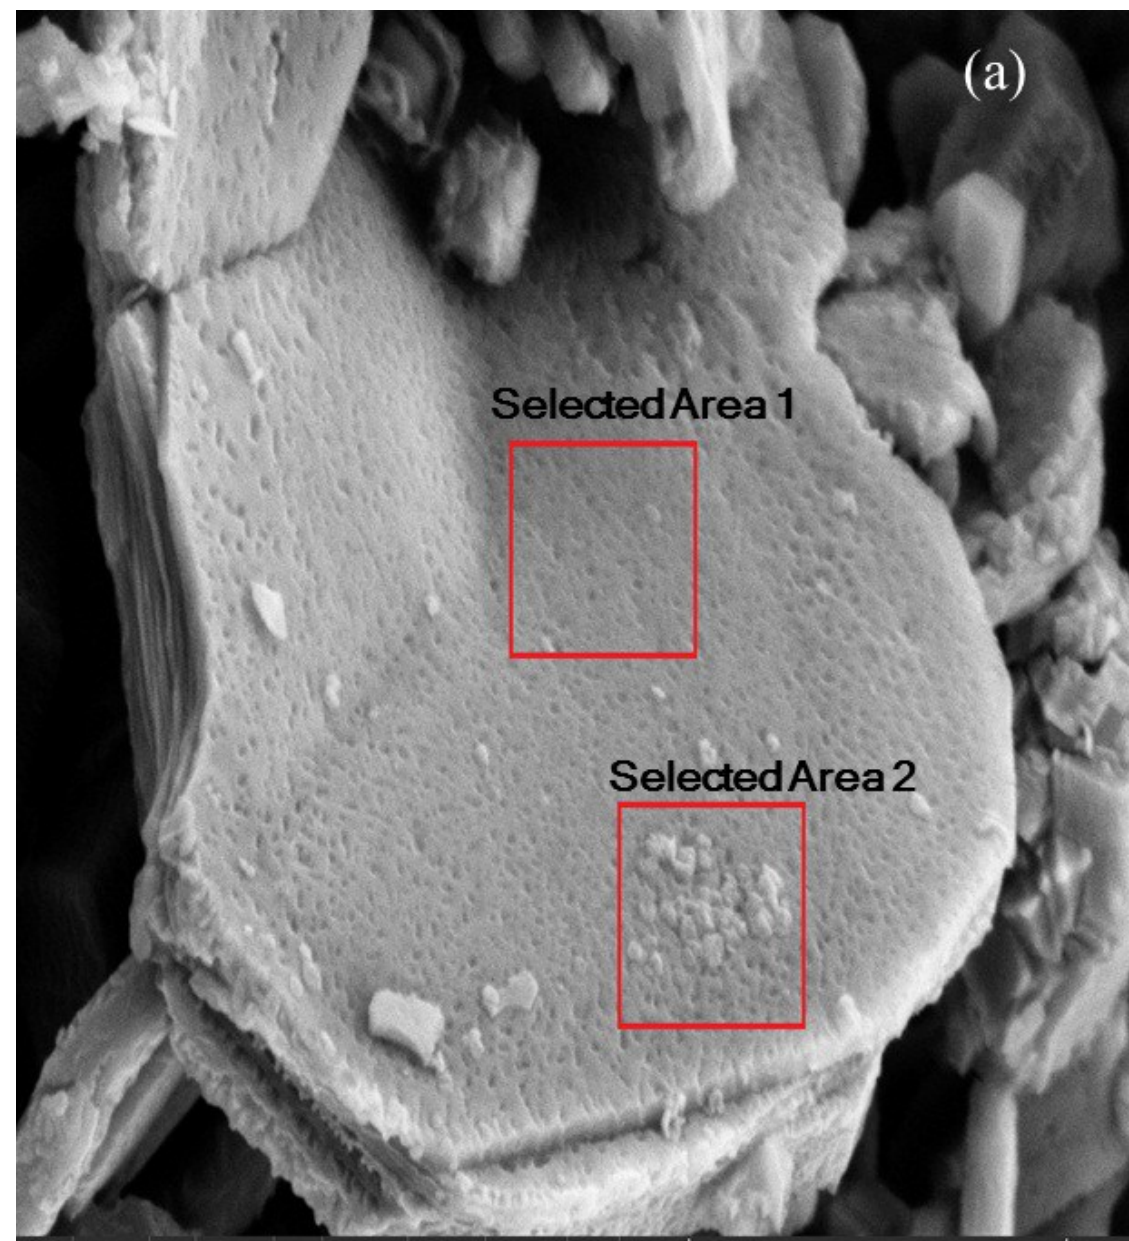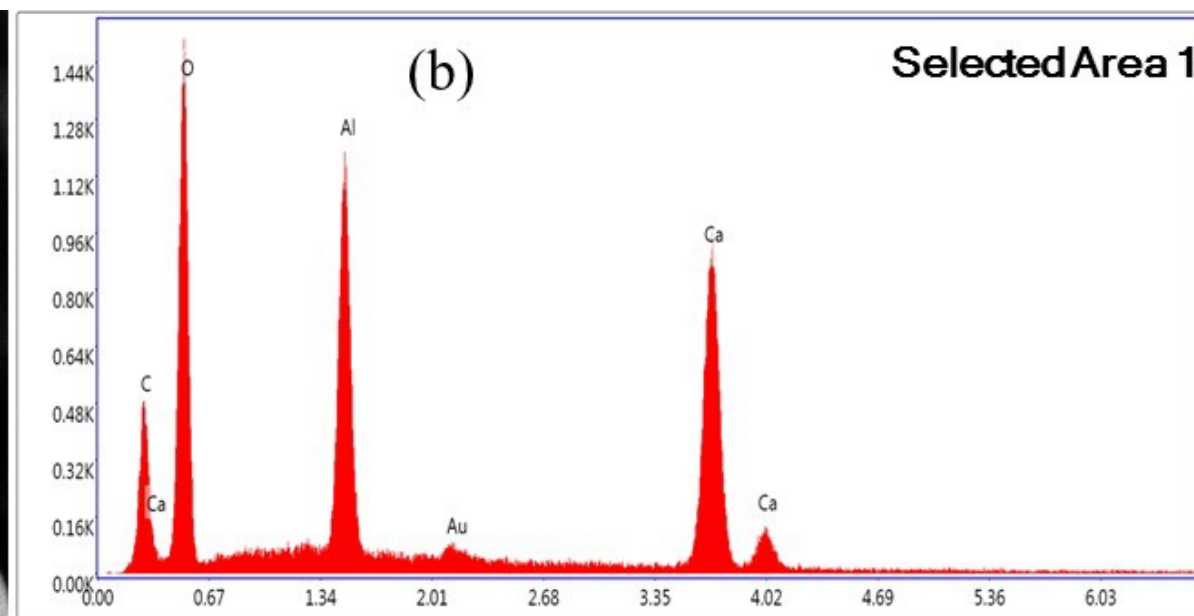

Lsec: 30.0 90 Cnts 2.135 keV Det: Octane Plus

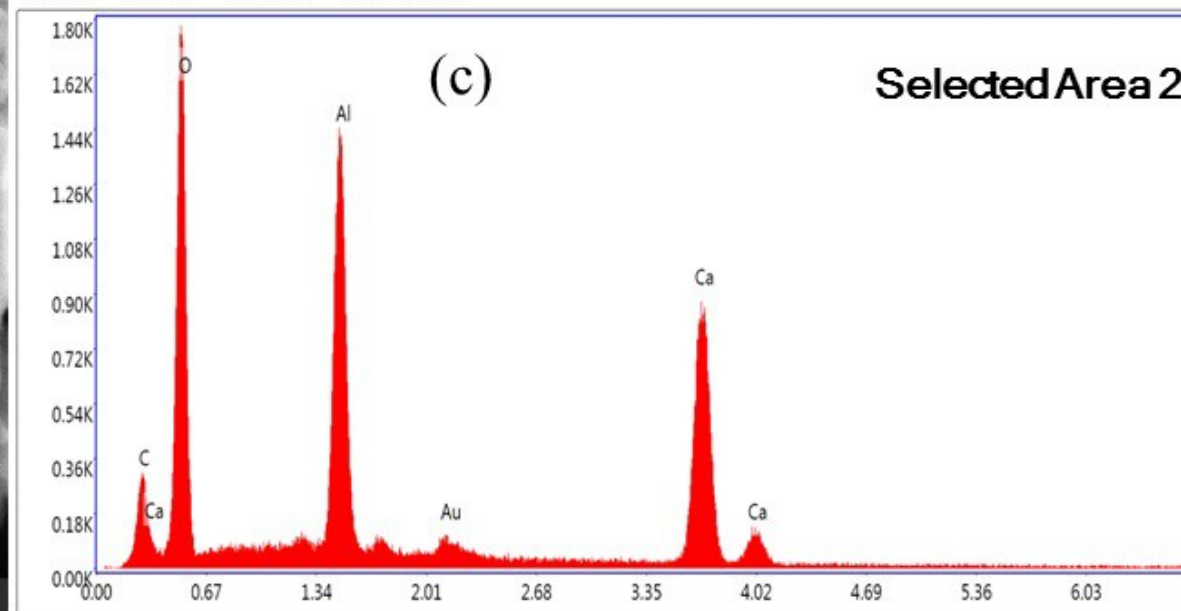

Lsec: 30.0 111 Cnts 2.135 keV Det: Octane Plus

Supplement: c9dt03913a6.pdf [file c9dt03913a6.pdf]

## Wt% of different elements calculated from EDX

C = 30

O = 32

Ca = 27.0

Al = 9.5

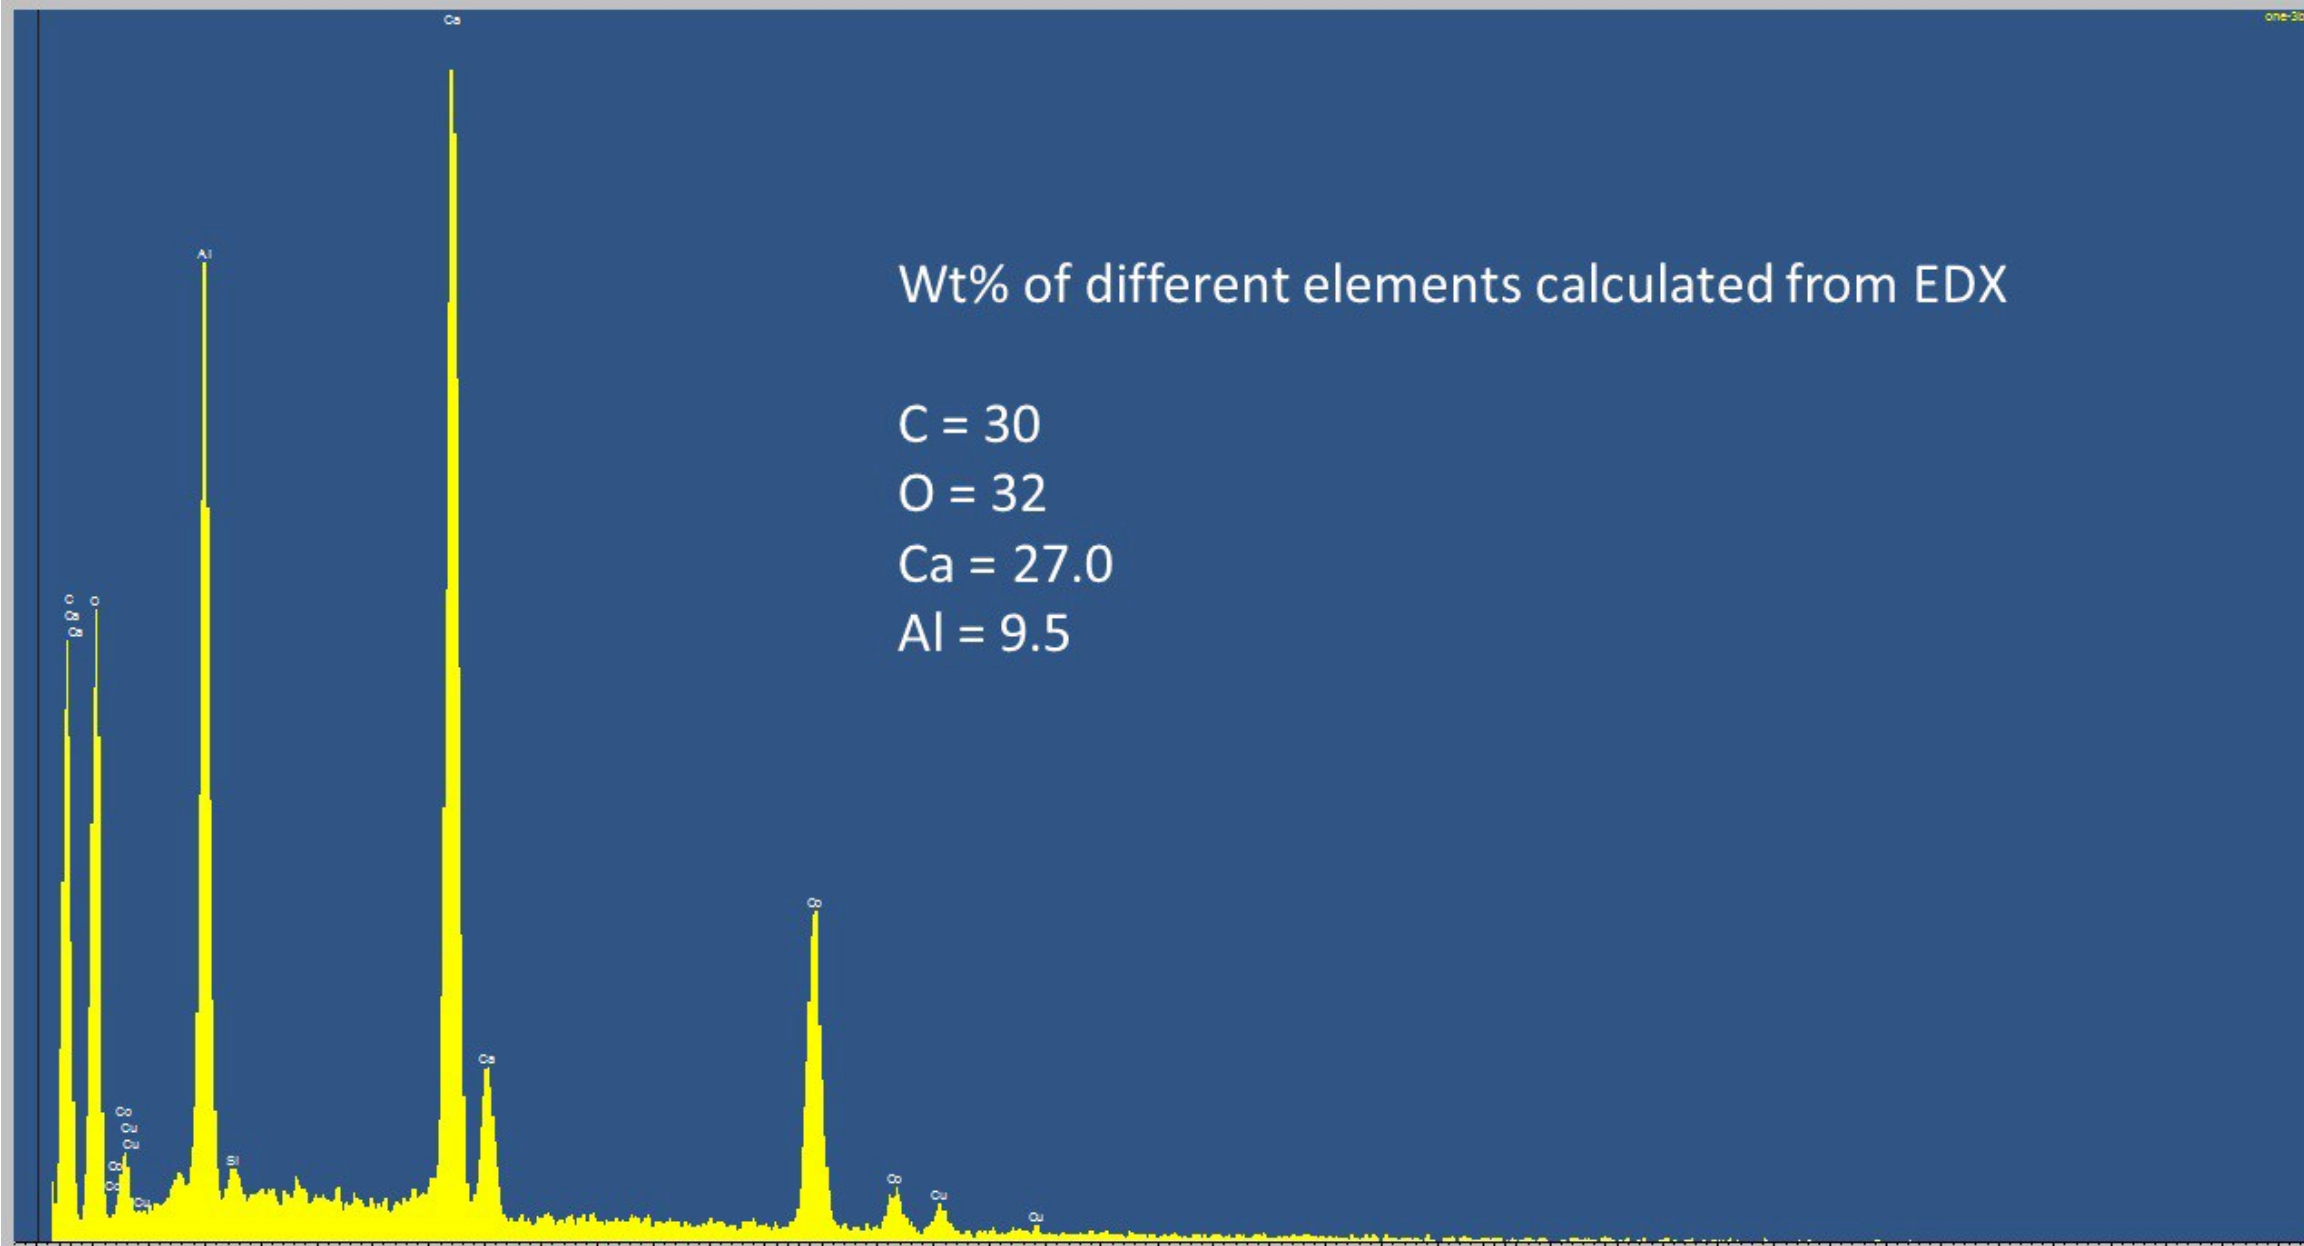

Supplement: c9dt03913a7.pdf [file c9dt03913a7.pdf]
